# Supplementary material for: A Prospective Study Assessing the Post-Prostatectomy Detection Rate of a Presumed Local Failure at mpMR with Either 64CuCl2 or 64CuPSMA PET/CT
Source: MDPI journal article supplement (doi:10.3390/cancers13215564), 2021-11-06
Supplement: s1 [file s1]

# Supplementary Materials: A Prospective Study Assessing the Post-Prostatectomy Detection Rate of a Presumed Local Failure at mpMR with Either $^{64}\text{CuCl}_2$ or $^{64}\text{CuPSMA}$ PET/CT

Adriana Faiella, Rosa Sciuto, Diana Giannarelli, Marta Bottero, Alessia Farneti, Luca Bertini, Sandra Rea, Valeria Landoni, Patrizia Vici, Maria Consiglia Ferriero and Giuseppe Sanguineti

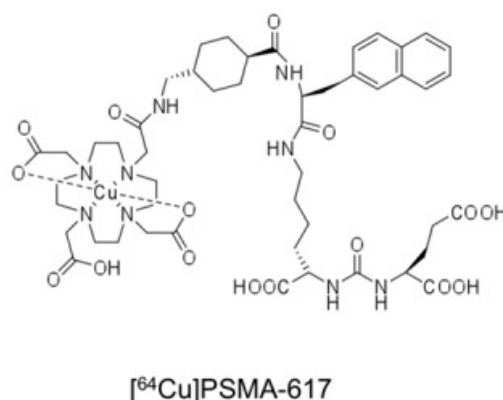

**Figure S1.** Structure of  $^{64}\text{Cu}$ -PSMA-617.  $^{64}\text{Cu}$  was radiolabeled through PSMA-617 (3S,10S,14S)-3-[(naphthalen-2-yl)methyl]-1,4,12-trioxo-1-[(1r,4S)-4-[[2-[4,7,10-tris(carboxymethyl)-1,4,7,10-tetraazacyclododecan-1-yl]acetamido]methyl]cyclo-hexyl]-2,5,11,13-tetraazahexadecane-10,14,16-tricarboxylic acid) provided by ABX, (Radeberg, Germany).

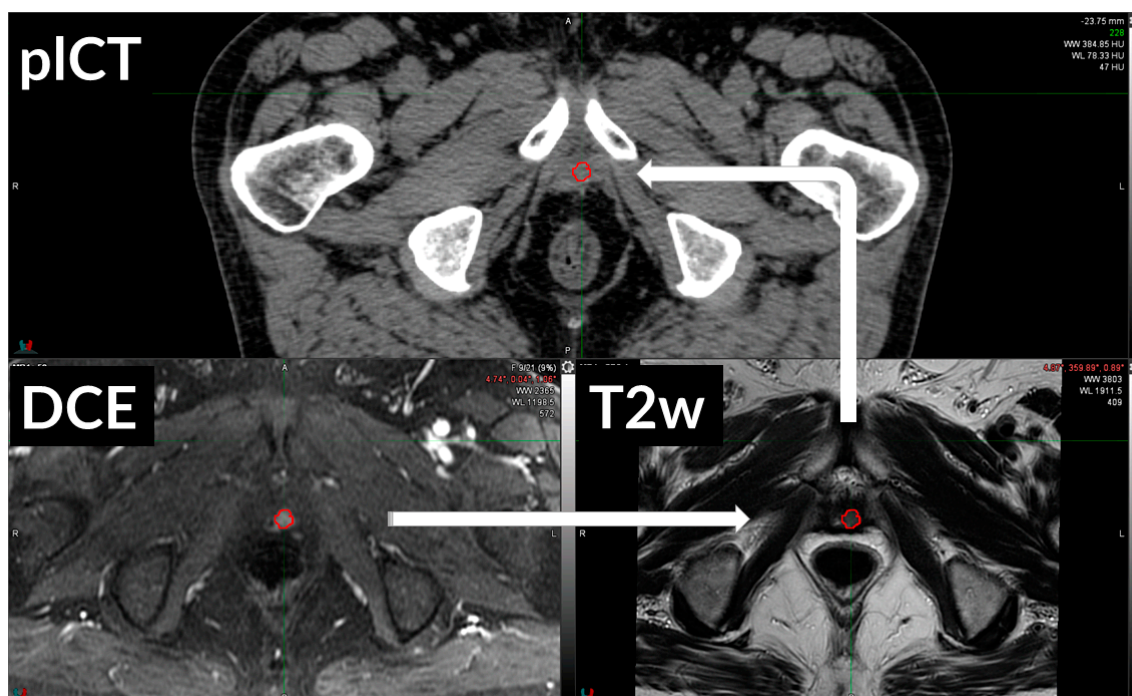

**Figure S2.** Co-registration between mpMR and planning CT (pLCT). The nodule was contoured on the appropriate phase of the DCE sequence. After co-registration between T2w sequence and pLCT, the nodule was transferred to the pLCT.

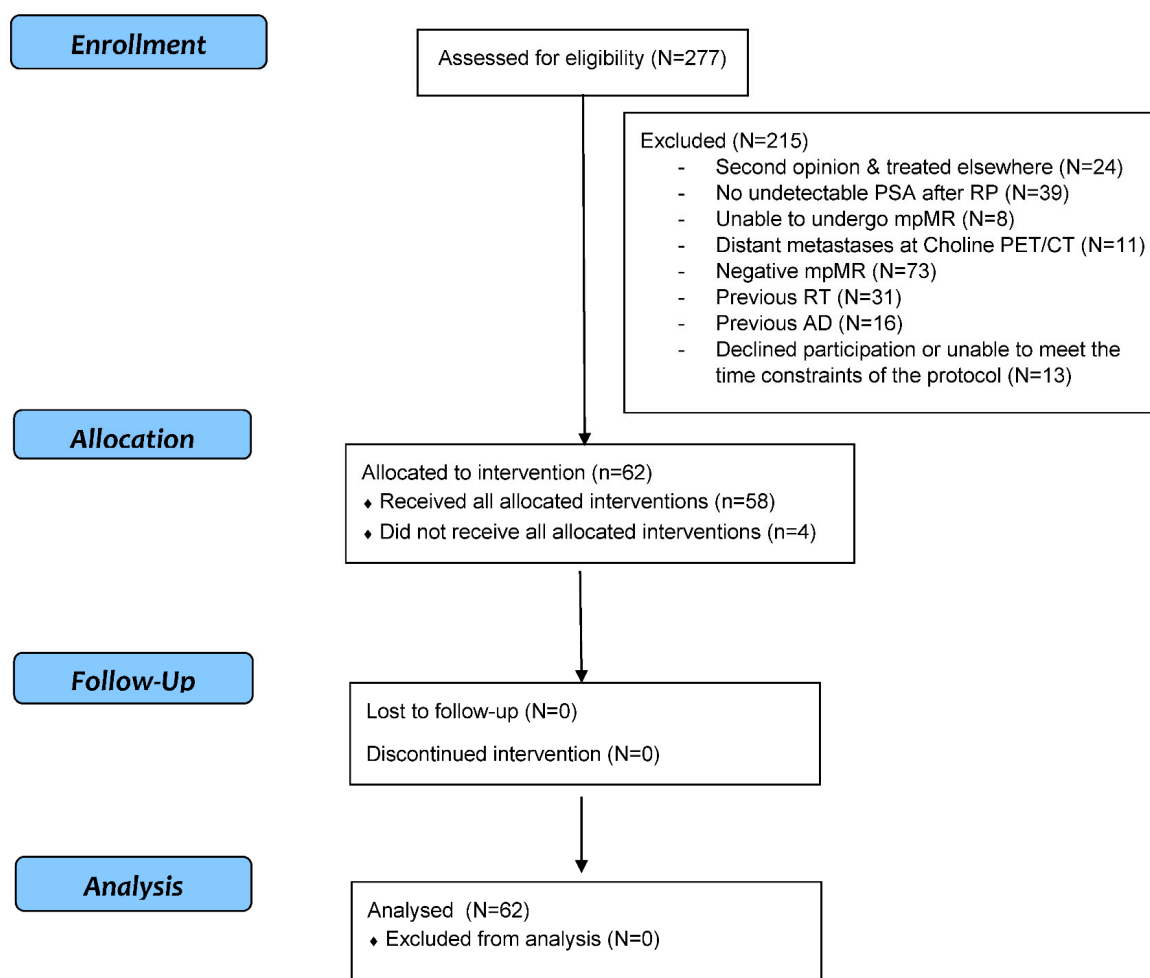

Figure S3. CONSORT flow diagram.

Table S1. Univariable analysis on DR for each PET/CT tracer.

| Covariate                  | Stratification | # nodules | Choline                |       | Cu                      |       | PSMA                     |       |
|----------------------------|----------------|-----------|------------------------|-------|-------------------------|-------|--------------------------|-------|
|                            |                |           | OR<br>(95%CI)          | p     | OR<br>(95%CI)           | p     | OR<br>(95%CI)            | p     |
| iwPSA (ng/ml)              | Continuum      | 72        | 3.282<br>(1.179–9.138) | 0.023 | 4.200<br>(1.139–15.482) | 0.031 | 12.715<br>(1.858–86.996) | 0.010 |
| PSADT (mth)                | Continuum      | 72        | 0.996<br>(0.974–1.019) | 0.731 | 0.968<br>(0.938–1.000)  | 0.050 | 0.988<br>(0.967–1.009)   | 0.267 |
| Volume at<br>mpMR (0.1cc)  | Continuum      | 72        | 1.911<br>(1.319–2.768) | 0.001 | 1.324<br>(1.059–1.655)  | 0.014 | 1.309<br>(1.045–1.639)   | 0.019 |
| Location of the<br>failure | Anastomotic    | 39        | 1                      |       | 1                       |       | 1                        |       |
|                            | Bladder neck   | 17        | 0.667<br>(0.196–2.273) | 0.517 | 1.069<br>(0.342–3.344)  | 0.909 | 0.869<br>(0.277–2.728)   | 0.810 |
|                            | Retrovescical  | 16        | 0.229<br>(0.045–1.150) | 0.073 | 0.432<br>(0.126–1.477)  | 0.181 | 0.464<br>(0.141–1.530)   | 0.207 |
| GGG                        | 1–2            | 33        | 1                      |       | 1                       |       | 1                        |       |
|                            | 3              | 29        | 2.622<br>(0.860–7.993) | 0.090 | 1.267<br>(0.464–3.455)  | 0.644 | 2.864<br>(1.020–8.040)   | 0.046 |
|                            | 4–5            | 10        | 1.592<br>(0.325–7.800) | 0.566 | 2.036<br>(0.482–8.603)  | 0.334 | 4.083<br>(0.887–18.805)  | 0.071 |

Abbreviations: iwPSA, individual weighted PSA; PSADT, PSA doubling time; mpMR, multiparametric MR; GGG, Gleason Grade Group; OR, odds ratio.
